## P190

### CMR assessment of right ventricular-pulmonary arterial coupling and right ventricular trabecular complexity: impact on prognosis in patients undergoing lung transplant assessment

Sarri G.; Halim K.; Mccurry M.; Pierce I.; Rahman-Haley S.; Simon A.; Carby M.; Reed A.; Wong J.

Harefield Hospital, Royal Brompton and Harefield Foundation Trust, Uxbridge, United Kingdom of Great Britain & Northern Ireland

Right ventricular (RV) function is prognostic in pulmonary hypertension (PH), but key metrics are unclear. We correlated a CMR index of RV-pulmonary arterial (PA) coupling, as well as RV trabecular complexity by its fractal dimension (FD) to prognosis.

84 patients underwent lung transplant assessment and CMR, with RV FD assessed using freely available code (FracAnalyse); RV-PA coupling was estimated by stroke volume (SV) / RV end systolic volume (ESV) ratio.

Median follow up was 19.33 ± 17.17 months; 94% of the patients had underlying lung disease. 51 of 66 patients had echo-detected PH. Survival was predicted by SV/ESV, RVEF, indexed RV end-diastolic (EDVi) and ESVi, and mPAP on univariate analysis. Both SV/ESV and RV FD correlated to mPAP, right atrial (RA) area, RVEDVi and RVESVi.

In patients referred for transplant assessment, RV functional adaptation to afterload on CMR predicted survival on univariate analysis. Fractal analysis of RV trabecular complexity correlated with metrics influencing RV remodelling and contractility.

|                       |         | All patients (n = 84), mean/median | SEM/IQR | Alive (n = 70), mean/median | SEM/IQR | Dead (n = 14), mean/median | SEM/IQR | Alive vs dead p value | Hazard Ratio | Confidence interval | p value |
|-----------------------|---------|------------------------------------|---------|-----------------------------|---------|----------------------------|---------|-----------------------|--------------|---------------------|---------|
| CMR LVED-Vi           |         | 58                                 | 23      | 59                          | 24      | 57                         | 19      | 0.93                  |              |                     |         |
| CMR LVES-Vi           |         | 22                                 | 13      | 21                          | 13      | 25                         | 13      | 0.30                  |              |                     |         |
| CMR LVEF              |         | 62                                 | 1.07    | 63                          | 1.14    | 58                         | 2.77    | 0.06                  |              |                     |         |
| CMR RVED-Vi           |         | 72                                 | 32      | 70                          | 28      | 83                         | 62      | 0.01                  | 1.03         | 1.01, 1.04          | <0.005  |
| CMR RVES-Vi           |         | 41                                 | 2.62    | 37                          | 2.06    | 64                         | 10.14   | 0.02                  | 1.03         | 1.01, 1.04          | <0.005  |
| CMR RVEF              |         | 51                                 | 18      | 53                          | 15      | 38                         | 17      | .001                  | 0.94         | 0.90, 0.97          | <0.005  |
| LGE                   |         | 14                                 |         | 9                           |         | 5                          |         | 0.04                  | 2.45         | 0.79, 7.61          | 0.12    |
| RV-PA coupling SV/ESV |         | 1.03                               | 0.72    | 1.12                        | 0.67    | 0.57                       | 0.48    | .001                  | 0.12         | 0.027, 0.52         | <0.005  |
| mPAP                  |         | 27                                 | 11      | 26                          | 10      | 33                         | 23      | 0.04                  | 1.05         | 1.01, 1.09          | <0.005  |
| Transplanted          |         | 22                                 |         | 15                          |         | 7                          |         | 0.03                  | 2.06         | 0.68, 6.22          | 0.20    |
| Correlation           |         | RV EDVI                            | RV ESVI | RV SVI                      | RV EF   | RA area                    | mPAP    |                       |              |                     |         |
| SV/ESV                | r value | -0.407                             | -0.712  | 0.250                       | 0.847   | -0.231                     | -0.301  |                       |              |                     |         |
|                       | p value | <0.001                             | <0.001  | .022                        | <0.001  | .042                       | .014    |                       |              |                     |         |

|                     |              | All patients<br>(n = 84),<br>mean/ me-<br>dian | SEM/<br>IQR | Alive (n =<br>70), mean/<br>median | SEM/<br>IQR | Dead (n =<br>14), mean/<br>median | SEM/<br>IQR | Alive<br>vs dead<br>p value | Haz-<br>ard<br>Ratio | Confi-<br>dence<br>interval | p value |
|---------------------|--------------|------------------------------------------------|-------------|------------------------------------|-------------|-----------------------------------|-------------|-----------------------------|----------------------|-----------------------------|---------|
| Global FD           | r value      | .319                                           | .303        | .130                               | -.203       | .280                              | .290        |                             |                      |                             |         |
|                     | p val-<br>ue | <0.005                                         | .005        | .238                               | .064        | .013                              | .018        |                             |                      |                             |         |
| Maximal<br>Basal FD | r value      | .389                                           | .350        | .226                               | -.196       | .296                              | .267        |                             |                      |                             |         |
|                     | p val-<br>ue | <0.001                                         | <0.005      | .039                               | .073        | .008                              | .030        |                             |                      |                             |         |
| Mean Basal<br>FD    | r value      | .401                                           | .373        | .179                               | -.215       | .350                              | .297        |                             |                      |                             |         |
|                     | p val-<br>ue | <0.001                                         | <0.001      | .102                               | .050        | <0.005                            | .016        |                             |                      |                             |         |
